# Supplementary material for: Exosomes derived from macrophages upon Zn ion stimulation promote osteoblast and endothelial cell functions
Source: Royal Society of Chemistry journal article supplement (doi:10.1039/d1tb00112d), 2021-01-01
Supplement: d1tb00112d1.pdf [file d1tb00112d1.pdf]

**Exosomes derived from macrophages upon Zn ion stimulation promote  
osteoblast and endothelial cell functions**

Jiachuan Liu, Yuyu Zhao, Yi Zhang, Xiaohong Yao\*, Ruiqiang Hang\*

*Laboratory of Biomaterial Surfaces & Interfaces, Institute of New Carbon Materials,  
College of Materials Science and Engineering, Taiyuan University of Technology,  
Taiyuan, 030024, China*

\* Corresponding authors.

E-mail: [hangruiqiang@tyut.edu.cn](mailto:hangruiqiang@tyut.edu.cn) (R.Q. Hang); [xhyao@tyut.edu.cn](mailto:xhyao@tyut.edu.cn) (X.H. Yao)

Table S1 RNA primers employed in this study.

| <b>Genes</b> | <b>Primer sequences</b>                                                        |
|--------------|--------------------------------------------------------------------------------|
| IL-10        | Forward: 5'-GAGAAGCATGGCCCAGAAATC-3'<br>Reverse: 5'-GAGAAATCGATGACAGCGCC-3'    |
| CD86         | Forward: 5'-CTGCTCATCATTGTATGTCAC-3'<br>Reverse: 5'-ACTGCCTTCACTCTGCATTTG-3'   |
| CD11         | Forward: 5'-CTGGATAGCCTTTCTTCTGCTG-3'<br>Reverse: 5'-GCACACTGTGTCCGAACTC-3'    |
| iNOS         | Forward: 5'-CACCAAGCTGAACTTGAGCG-3'<br>Reverse: 5'-CGTGGCTTTGGGCTCCTC-3'       |
| CD206        | Forward: 5'-AGACGAAATCCCTGCTACTG-3'<br>Reverse: 5'-CACCCATTCGAAGGCATTC-3'      |
| ARG-1        | Forward: 5'-CTCCAAGCCAAAGTCCTTAGAG-3'<br>Reverse: 5'-AGGAGCTGTCATTAGGGACATC-3' |
| GAPDH        | Forward: 5'-TGACCACAGTCCATGCCATC-3'<br>Reverse: 5'-GACGGACACATTGGGGGTAG-3'     |
